# Supplementary material for: AFM-based bivariate morphological discrimination of apoptosis induced by photodynamic therapy using photosensitizer-functionalized gold nanoparticles
Source: Royal Society of Chemistry journal article supplement (doi:10.1039/c5ra15479k), 2015-01-01
Supplement: c5ra15479k1.pdf [file c5ra15479k1.pdf]

**AFM-based bivariate morphological discrimination of apoptosis induced  
by photodynamic therapy using photosensitizer-functionalized gold  
nanoparticles**

Rasoul Al-Majmaie<sup>a,b,c</sup>, Eamonn Kennedy<sup>a</sup>, Mohamed Al-Rubeai<sup>b</sup>, James H. Rice<sup>a</sup>, Dominic  
Zerulla<sup>a\*</sup>

a School of Physics, University College Dublin, Belfield, Dublin, Ireland

b School of Chemical and Bioprocess Engineering, University College Dublin, Ireland

c Institute of Laser for Postgraduate Studies, University of Baghdad, Iraq

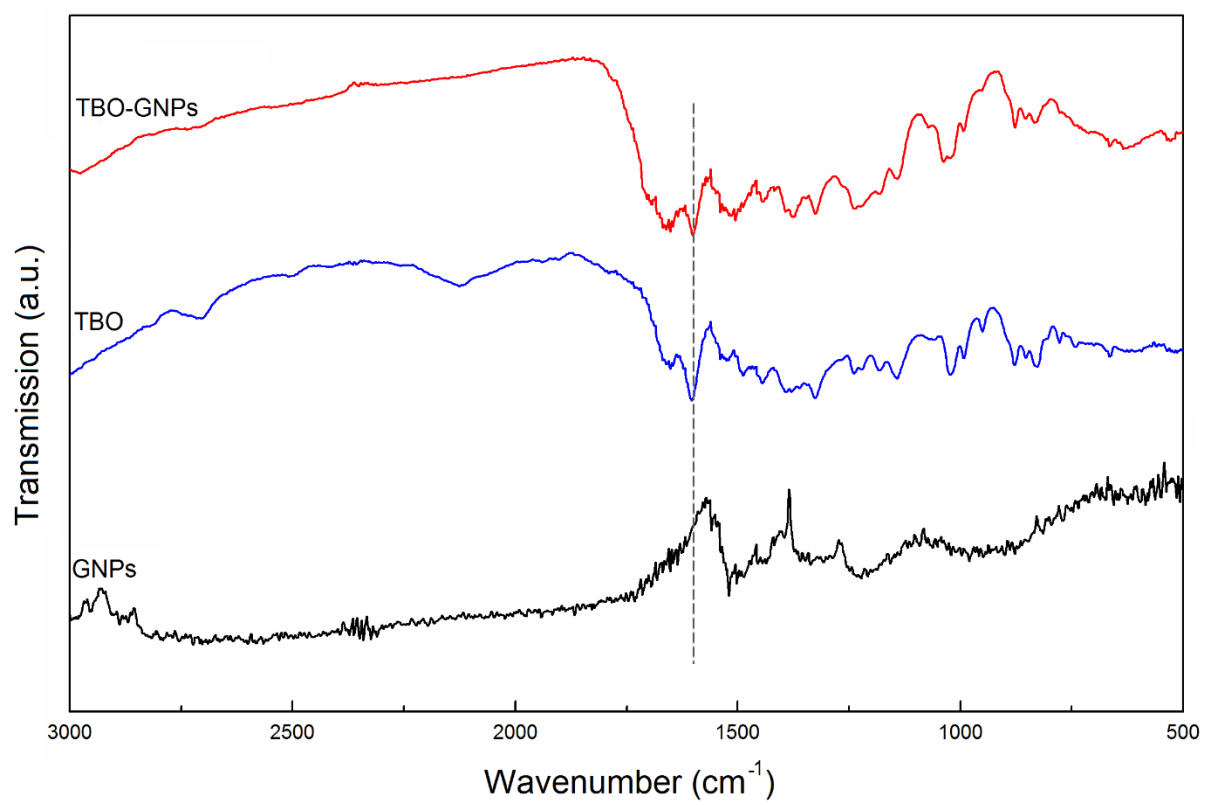

Figure S1: FTIR spectra of GNPs, free TBO, and TBO-GNPs.

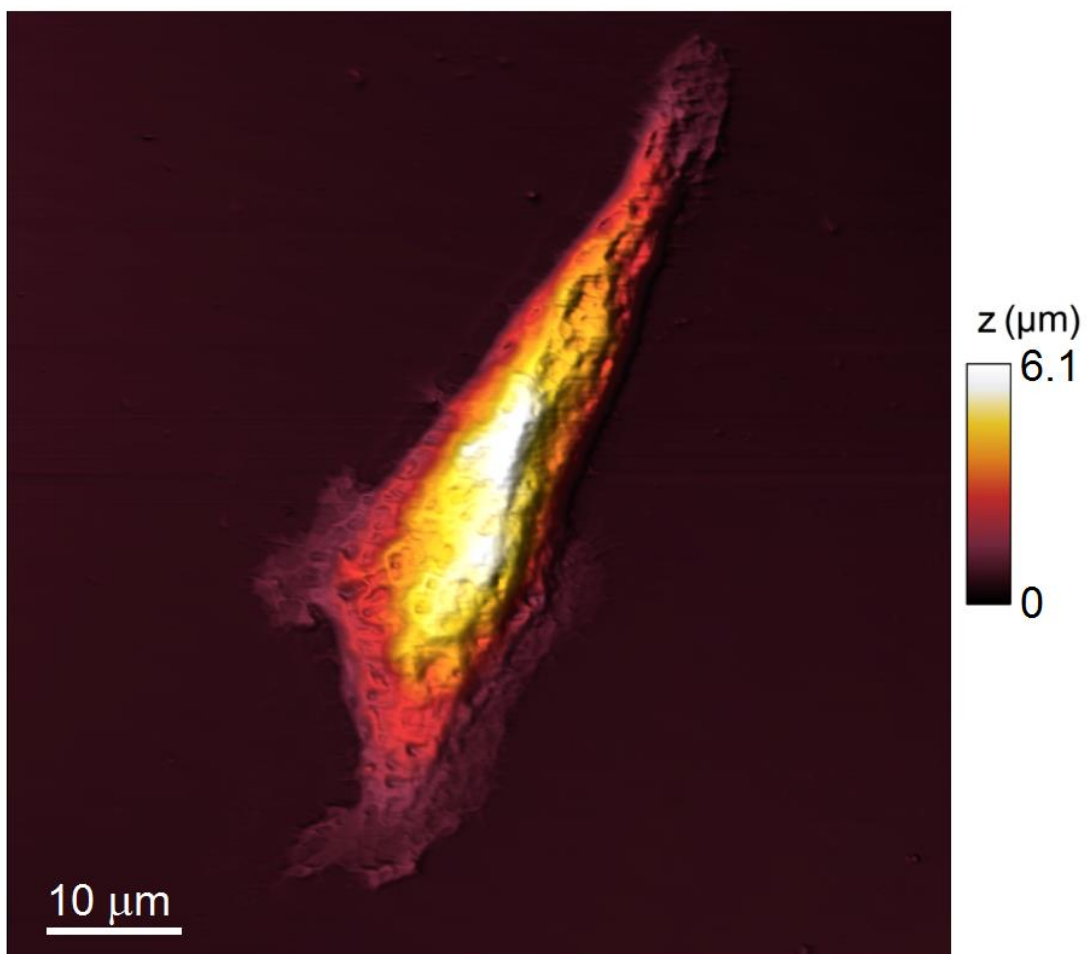

Figure S2: AFM imaging of a typical apoptotic cell.
